# Supplementary material for: Contrasting water adhesion strengths of hydrophobic surfaces engraved with hierarchical grooves: lotus leaf and rose petal effects
Source: Royal Society of Chemistry journal article supplement (doi:10.1039/c7nr05713j), 2017-01-01
Supplement: c7nr05713j1.pdf [file c7nr05713j1.pdf]

## Supporting Information

### Contrasting water adhesion strengths of hydrophobic surfaces engraved with hierarchical grooves: lotus leaf and rose petal effects

*Zhengqing Zhang,<sup>a</sup> Man Yeong Ha,<sup>b</sup> and Joonkyung Jang<sup>\*a</sup>*

*<sup>a</sup>Department of Nanoenergy Engineering and <sup>b</sup>School of Mechanical Engineering, Pusan  
National University, Busan 46241, Republic of Korea*

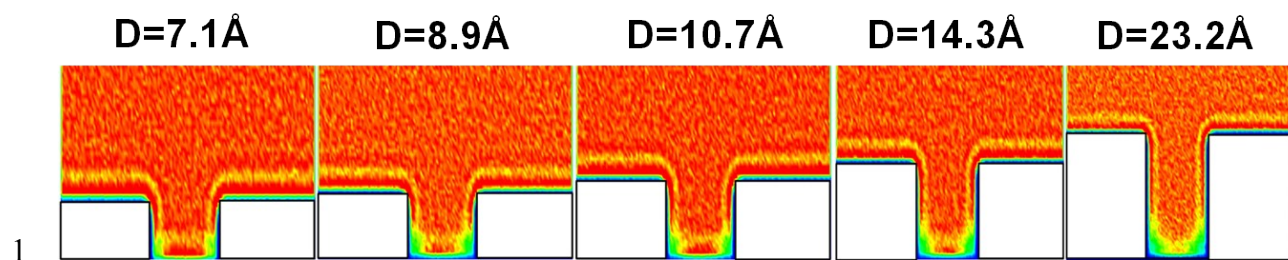

**Fig. S1** Fully wet (WZ) states of single-scale grooves. The water density profiles in the WZ states are drawn as color maps for various groove depths,  $D_s$ .

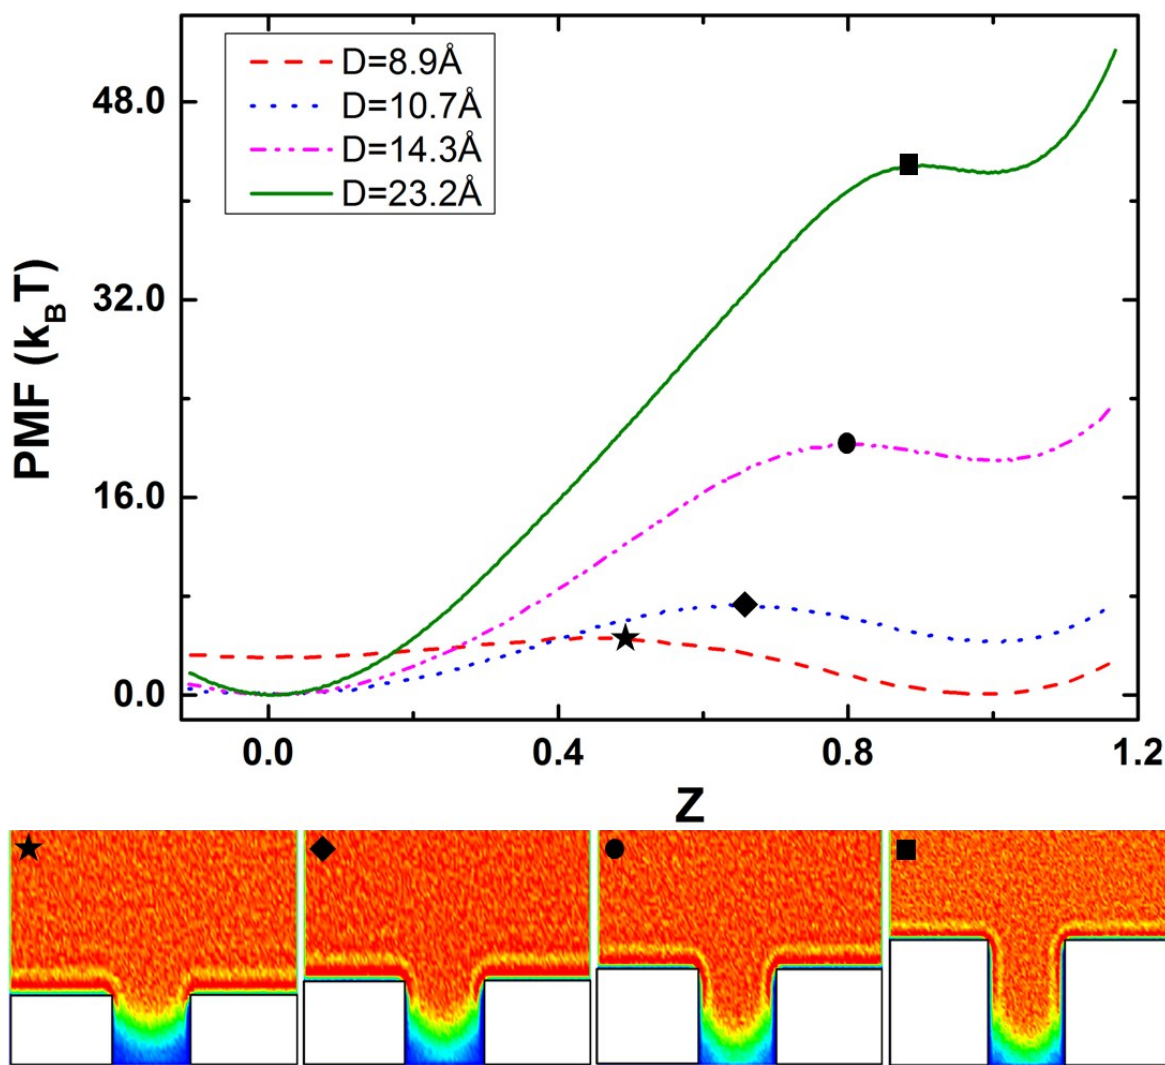

**Fig. S2** Free energy profiles for the wetting transitions of non-hierarchical grooves with various depths,  $D$ s. PMF is plotted vs. the filling level  $Z$  for  $D$ s of 8.9, 10.7, 14.3, and 23.2 Å. Drawn in the bottom are the water density profiles at the transition states marked with the symbols in the PMF curves.
